# Supplementary material for: A self-assembled tetrameric water cluster stabilized by the hexachlororhenate(IV) anion and diprotonated 2,2′-biimidazole: X-ray structure and magnetic properties
Source: Royal Society of Chemistry journal article supplement (doi:10.1039/b806729e), 2008-01-01
Supplement: b806729e.pdf [file b806729e.pdf]

# A Self-assembled Tetrameric Water Cluster stabilized by the Hexachlororhenate(IV) Anion and diprotonated 2,2'-Biimidazole: X-ray Structure and Magnetic Properties

José Martínez-Lillo,<sup>\*a,b</sup> Donatella Armentano,<sup>b</sup> Giovanni De Munno,<sup>\*b</sup> Nadia Marino,<sup>b</sup> Francesc Lloret,<sup>a</sup> Miguel Julve<sup>a</sup> and Juan Faus<sup>a</sup>

<sup>a</sup> *Departamento de Química Inorgánica/Instituto de Ciencia Molecular, Facultad de Química de la Universidad de Valencia, Dr. Moliner 50, 46100, Burjassot, Valencia, Spain. E-mail: [juan.faus@uv.es](mailto:juan.faus@uv.es), [lillo@uv.es](mailto:lillo@uv.es)*

<sup>b</sup> *Dipartimento di Chimica, Università della Calabria, via P. Bucci 14/c, 87036, Rende, Cosenza, Italy. E-mail: [demunno@unical.it](mailto:demunno@unical.it)*

## Supporting information:

**Table S1.** Bond lengths [Å] and angles [°] for [ReCl<sub>6</sub>]<sup>2-</sup> anion in **1**.

---

|                    |           |                    |          |
|--------------------|-----------|--------------------|----------|
| Re(1)-Cl(1)        | 2.3536(5) |                    |          |
| Re(1)-Cl(2)        | 2.3711(5) |                    |          |
| Re(1)-Cl(3)        | 2.3520(5) |                    |          |
| Cl(1)-Re(1)-Cl(2)  | 90.72(2)  | Cl(1)-Re(1)-Cl(3b) | 89.51(2) |
| Cl(1)-Re(1)-Cl(2b) | 89.28(2)  | Cl(2)-Re(1)-Cl(3)  | 90.26(2) |
| Cl(1)-Re(1)-Cl(3)  | 90.49(2)  | Cl(2)-Re(1)-Cl(3b) | 89.74(2) |

---

(b) -x+1, -y+1, -z+1

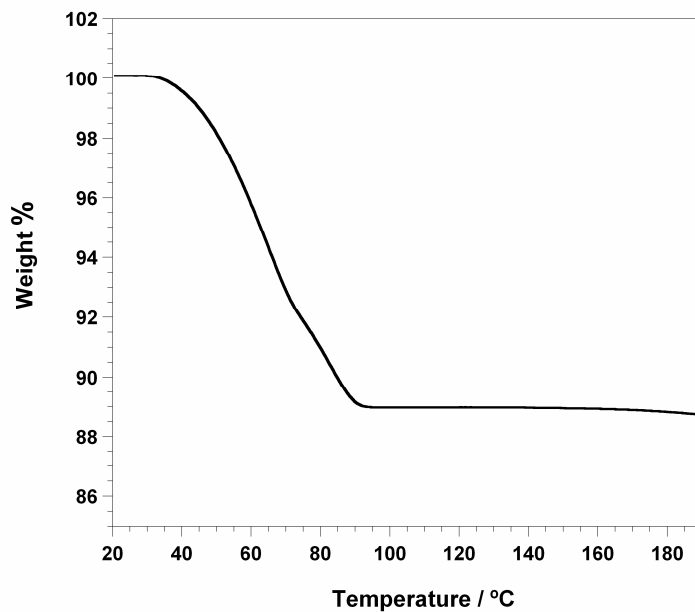

**Fig. S1** TGA curve for **1**.

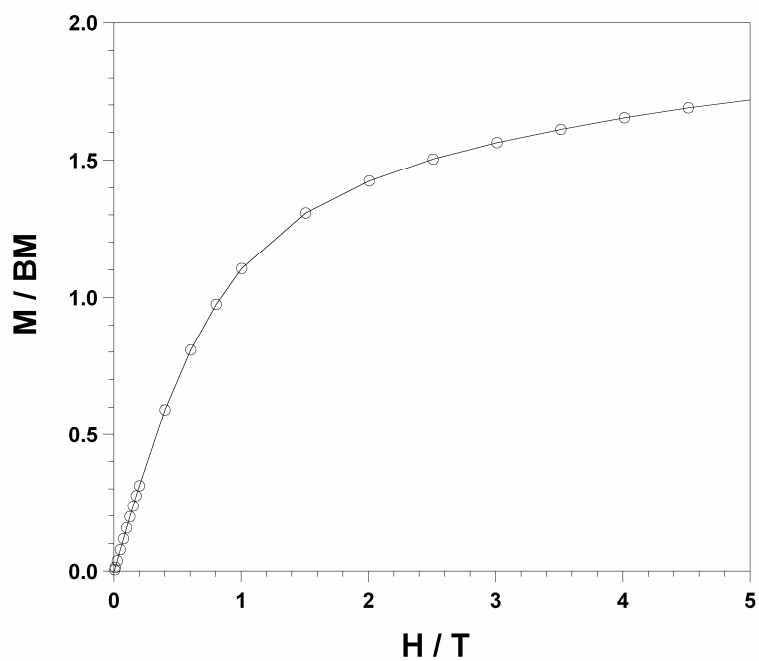

**Fig. S2** Magnetization curve for **1** at 2 K. The open circles are the experimental data and the solid line is a visual guide.
